# Supplementary material for: Chemical structure and bonding in a thorium(iii)–aluminum heterobimetallic complex
Source: Royal Society of Chemistry journal article supplement (doi:10.1039/c8sc01260a), 2018-01-01
Supplement: c8sc01260a1.pdf [file c8sc01260a1.pdf]

## Chemical Structure and Bonding in a Thorium(III)-Aluminum Heterobimetallic Complex

*Alison B. Altman,<sup>1,2</sup> Alexandra C. Brown,<sup>1</sup> Guodong Rao,<sup>3</sup> Trevor D. Lohrey,<sup>1,2</sup> R. David Britt,<sup>3</sup>*

*Laurent Maron,<sup>4</sup> Stefan G. Minasian<sup>2</sup>, David K. Shuh,<sup>2</sup> John Arnold<sup>1,2</sup>*

<sup>1</sup>Department of Chemistry, University of California, Berkeley, California, 94720; <sup>2</sup>Chemical Sciences Division, Lawrence Berkeley National Laboratory, Berkeley, California 94720;

<sup>3</sup>Department of Chemistry, University of California, Davis, California, 95616; <sup>4</sup>LPCNO, Université de Toulouse, INSA Toulouse, 135 Avenue de Rangueil, 31077 Toulouse France

### Supporting Information

|    |                                                           |     |
|----|-----------------------------------------------------------|-----|
| A. | Synthetic Details .....                                   | S2  |
| B. | NMR Spectra .....                                         | S5  |
| C. | Infrared Spectra .....                                    | S11 |
| D. | UV-Vis Spectra.....                                       | S12 |
| E. | Crystallographic Details .....                            | S13 |
| F. | Electron Paramagnetic Resonance Spectroscopy Details..... | S14 |
| G. | Computational Details .....                               | S16 |
| H. | References.....                                           | S23 |

## A. Synthetic Details

**General Synthetic Details.** All reactions were performed under an inert atmosphere either using standard Schlenk technique or in a MBraun glovebox (<0.5 ppm O<sub>2</sub>/H<sub>2</sub>O). Toluene, *n*-hexane, diethyl ether (Et<sub>2</sub>O), tetrahydrofuran (THF) and dimethoxyethane (DME) were dried and degassed using the commercially available Phoenix Solvent Drying System from JC Meyer Solvent Systems. Hexamethyldisiloxane (HMDSO), C<sub>6</sub>D<sub>6</sub>, and *d*<sup>8</sup>-toluene were dried over sodium/benzophenone and either vacuum transferred to a storage flask or distilled under N<sub>2</sub>. Solution NMR spectra were collected on either Bruker AV-500, AV-600 or DRX-500 spectrometers. <sup>1</sup>H and <sup>13</sup>C{<sup>1</sup>H} NMR chemical shifts (δ in ppm) were calibrated to residual solvent peaks. <sup>27</sup>Al NMR chemical shifts were referenced to an external standard of 1 M Al(NO<sub>3</sub>)<sub>3</sub> in H<sub>2</sub>O/D<sub>2</sub>O (δ = 0 ppm). FT-IR samples were prepared as Nujol mulls and were taken between KBr disks using a Nicolet iS10 FT-IR spectrometer. Melting points were determined using an OptiMelt automated melting point system. UV–visible spectra were collected in hexane and determined with a Varian Cary 50 UV-visible spectrophotometer using a Schlenk-adapted 1 cm quartz cell. Elemental analyses were determined at the Microanalytical facility at University of California, Berkeley. All reagents were acquired from commercial sources and used without further purification. Cp<sub>2</sub>TiH<sub>3</sub>AlC(SiMe<sub>3</sub>)<sub>3</sub> and K[H<sub>3</sub>AlC(SiMe<sub>3</sub>)<sub>3</sub>],<sup>1</sup> KCp<sup>‡</sup>,<sup>2</sup> UI<sub>3</sub>(1,4-dioxane)<sub>1.5</sub>,<sup>3</sup> ThCl<sub>4</sub>(DME)<sub>2</sub>,<sup>4</sup> and KC<sub>8</sub><sup>5</sup> were synthesized according to previous literature procedures.

**Synthesis of Cp<sup>‡</sup><sub>2</sub>ThCl<sub>2</sub>.** A modified version of a literature procedure was used.<sup>6</sup> A slurry of KCp<sup>‡</sup> (3.28 g, 14.4 mmol) and ThCl<sub>4</sub>(DME)<sub>2</sub> (4.00 g, 7.22 mmol) in THF (60 ml) was stirred for 2 days. Solvent was removed *in vacuo*, and the residue was extracted with *n*-hexane (2 x 40 ml) and filtered. The solution was concentrated until saturation and colorless crystals formed upon storage at -40 °C overnight (3.44 g, 72% yield). <sup>1</sup>H-NMR data was consistent with reported values.

**Synthesis of Cp<sup>‡</sup><sub>2</sub>ThClH<sub>3</sub>AlC(SiMe<sub>3</sub>)<sub>3</sub> (2).** A solution of K[H<sub>3</sub>AlC(SiMe<sub>3</sub>)<sub>3</sub>] (0.64 g, 2.1 mmol) in toluene (~25 ml) was added to a solution of Cp<sup>‡</sup><sub>2</sub>ThCl<sub>2</sub> (1.00 g, 1.52 mmol) in toluene (25 ml). The reaction mixture was stirred for 1 h, and the solvent was removed *in vacuo*. The white residue was extracted into *n*-hexane (30 ml) and filtered through Celite®. The solvent was removed *in vacuo* and a <sup>1</sup>H-NMR spectrum of the resulting white solid

was collected to determine the relative amount of  $\text{Cp}^*_2\text{Th}(\text{H})\text{H}_3\text{AlC}(\text{SiMe}_3)_3$  based on the observed integrations. The residue was dissolved in toluene (10 ml) and a stoichiometric amount of chlorotrimethylsilane relative to the  $\text{Cp}^*_2\text{Th}(\text{H})\text{H}_3\text{AlC}(\text{SiMe}_3)_3$  was added. The reaction was stirred overnight. The solvent was removed *in vacuo* and the resulting white solid was found to be analytically pure and used directly for subsequent reactions (1.20 g, 89% yield). X-ray quality crystals were grown from a HMDSO solution stored at room temperature for 4 days.  $^1\text{H}$  NMR (500 MHz,  $\text{C}_6\text{D}_6$ , 293 K)  $\delta$  6.44 (m, 2H, CpH), 6.29 (m, 4H, CpH), 4.83 (s, 3H, Th-H-Al), 1.51 (s, 18H, C-CH<sub>3</sub>), 1.37 (s, 18H, C-CH<sub>3</sub>), 0.38 (s, 27H, Si-CH<sub>3</sub>).  $^{13}\text{C}\{^1\text{H}\}$  NMR (126 MHz,  $\text{C}_6\text{D}_6$ , 293 K)  $\delta$  150.93 (Cp), 149.89 (Cp), 115.40 (Cp), 115.03 (Cp), 113.66 (Cp), 34.24 (C-CH<sub>3</sub>), 33.63 (C-CH<sub>3</sub>), 32.69 (C-CH<sub>3</sub>), 31.93 (C-CH<sub>3</sub>), 5.36 (Si-CH<sub>3</sub>).  $^{27}\text{Al}$  NMR (104 MHz,  $\text{C}_6\text{D}_6$ , 293 K) no resonances observed. MP: dec > 177°C. FT-IR (KBr, Nujol,  $\text{cm}^{-1}$ ): 1710 (m, Al-H stretch), 1599 (w, Al-H stretch). Anal calcd. (%) for  $\text{C}_{36}\text{H}_{72}\text{AlSi}_3\text{ThCl}$ : C, 48.93; H, 8.21 Found: C, 48.55; H, 8.36.

**Synthesis of  $\text{Cp}^*_2\text{Th}(\text{H})\text{H}_3\text{AlC}(\text{SiMe}_3)_3$  (3).** A solution of  $\text{K}[\text{H}_3\text{AlC}(\text{SiMe}_3)_3]$  (0.50 g, 1.7 mmol) in toluene (15 ml) was added to a solution of  $\text{Cp}^*_2\text{ThCl}_2$  (0.50 g, 0.76 mmol) in toluene (15 ml). The reaction mixture was refluxed for 2 days, and the solvent was removed *in vacuo*. The residue was extracted into *n*-hexane (30 ml) and filtered through Celite®, and the solvent was removed *in vacuo*. The residue was extracted into 10 ml of HMDSO, and concentrated to saturation (~2 ml). The solution was stored at -40 °C overnight to afford colorless crystals of the desired product (0.32 g, 50.% yield).  $^1\text{H}$  NMR (500 MHz,  $\text{C}_6\text{D}_6$ , 293 K)  $\delta$  15.11 (s, ThH), 5.85 (m, 2H, CpH), 5.71 (m, 4H, CpH), 3.49 (s, 3H, Th-H-Al), 1.59 (s, 18H, C-CH<sub>3</sub>), 1.36 (s, 18H, C-CH<sub>3</sub>), 0.34 (s, 27H, Si-CH<sub>3</sub>).  $^{13}\text{C}\{^1\text{H}\}$  NMR (126 MHz,  $\text{C}_6\text{D}_6$ , 293 K)  $\delta$  150.12 (Cp), 146.94 (Cp), 110.48 (Cp), 110.29 (Cp), 107.94 (Cp), 33.28 (C-CH<sub>3</sub>), 33.24 (C-CH<sub>3</sub>), 33.13 (C-CH<sub>3</sub>), 32.74 (C-CH<sub>3</sub>), 5.11 (Si-CH<sub>3</sub>).  $^{27}\text{Al}$  NMR (104 MHz,  $\text{C}_6\text{D}_6$ , 293 K) no resonances observed. MP: dec > 173°C. FT-IR (KBr, Nujol,  $\text{cm}^{-1}$ ): 1682 (m, Al-H stretch), 1602 (w, Al-H stretch). Anal calcd. (%) for  $\text{C}_{36}\text{H}_{72}\text{AlSi}_3\text{Th}$ : C, 50.91; H, 8.66 Found: C, 50.54; H, 8.43.

**Synthesis of  $\text{Cp}^*_2\text{ThH}_3\text{AlC}(\text{SiMe}_3)_3$  (4).** A solution of  $\text{Cp}^*_2\text{ThClH}_3\text{AlC}(\text{SiMe}_3)_3$  (0.35 g, 0.40 mmol) in *n*-hexane (6 ml) was added to a stirring suspension of  $\text{KC}_8$  (0.083 mg, 0.60 mmol) in *n*-hexane (4 ml) to produce a dark purple solution. The reaction was stirred for 24 h and an additional 1.5 equivalents of  $\text{KC}_8$  (0.083 mg, 0.60 mmol) were added to the

stirring solution. The reaction was stirred for 4 additional days, and the solvent was removed *in vacuo*. The dark purple residue was extracted into HMDSO and filtered through Celite®. The purple solution was concentrated to saturation, and storage of the solution at -40 °C overnight afforded the desired product as dark purple crystals (0.116 g of a 1:0.15:0.5 mixture of **4:3:2** as determined by <sup>1</sup>H NMR, 28% yield). X-ray quality crystals could be grown upon recrystallization from HMDSO found to be 1:0.12 mixtures of **4:3**. <sup>1</sup>H NMR (600 MHz, C<sub>6</sub>D<sub>6</sub>, 293 K) δ 5.81 (s, br), 0.56 (s, br). UV-vis, [nm, ε (M<sup>-1</sup> cm<sup>-1</sup>)] 360., 1694; 440., 730.; 520, 3999; 585, 2150.; 640., 2482. MP: dec > 190.5 °C. FT-IR (KBr, Nujol, cm<sup>-1</sup>): 1674 (m, Al-H stretch). Anal calcd. (%) for C<sub>36</sub>H<sub>72</sub>AlSi<sub>3</sub>Th: C, 50.98; H, 8.56 Found: C, 50.68; H, 8.32. μ<sub>eff</sub> = 1.83 μ<sub>B</sub> at 297.1 K.

**Synthesis of [Cp<sup>†</sup><sub>2</sub>UI]<sub>2</sub>.** An adaptation of literature procedure for the synthesis of [Cp<sup>†</sup><sub>2</sub>UCl]<sub>2</sub> was used.<sup>7</sup> UI<sub>3</sub>(1,4-dioxane)<sub>1.5</sub> was dissolved in THF and stirred for 30 minutes, then the solvent was removed *in vacuo*. The dark blue solid was dissolved in THF, and a solid suspension of KCp<sup>†</sup> in THF was added. The reaction mixture was stirred for 16 hours resulting in a dark green solution. The solvent was removed *in vacuo*. The residue was extracted with hexane, and the green solution was filtered through Celite®. The solvent was removed *in vacuo* and the crude green solid was used without further characterization. The IR spectrum was consistent with previous literature reports.<sup>8</sup>

**Synthesis of Cp<sup>†</sup><sub>2</sub>UH<sub>3</sub>AlC(SiMe<sub>3</sub>)<sub>3</sub> (**5**).** A solution of K[H<sub>3</sub>AlC(SiMe<sub>3</sub>)<sub>3</sub>] (0.12 g, 0.40 mmol) in toluene (4 ml) was added to a solution of [Cp<sup>†</sup><sub>2</sub>UI]<sub>2</sub> (0.25 g, 0.35 mmol) in toluene (6 ml) to produce a brown solution. The reaction mixture was stirred overnight, and the solvent was removed *in vacuo*. The brown residue was triturated with *n*-hexane and extracted with HMDSO (10 ml). The brown solution was filtered through Celite®, and concentrated until saturated (~ 4 ml). Storage of the solution at -40 °C overnight afforded the desired product as dark yellow crystals (0.12 g). A second crop was isolated upon further concentration of the remaining solution (0.033 g, 51% total yield). <sup>1</sup>H NMR (500 MHz, C<sub>6</sub>D<sub>6</sub>, 293 K) δ 40.93 (s, br), 2.15 (s, br), -14.03 (s, br), -32.28 (s, br). UV-vis, [nm, ε (M<sup>-1</sup> cm<sup>-1</sup>)] 337, 2282; 411, 816; 475, 299. MP: dec > 185 °C. FT-IR (KBr, Nujol, cm<sup>-1</sup>): 1580 (w, Al-H stretch). Anal calcd. (%) for C<sub>36</sub>H<sub>72</sub>AlSi<sub>3</sub>U: C, 50.62; H, 8.50 Found: C, 50.46; H, 8.53. μ<sub>eff</sub> = 2.88 μ<sub>B</sub> at 296.8 K.

## B. NMR Spectra

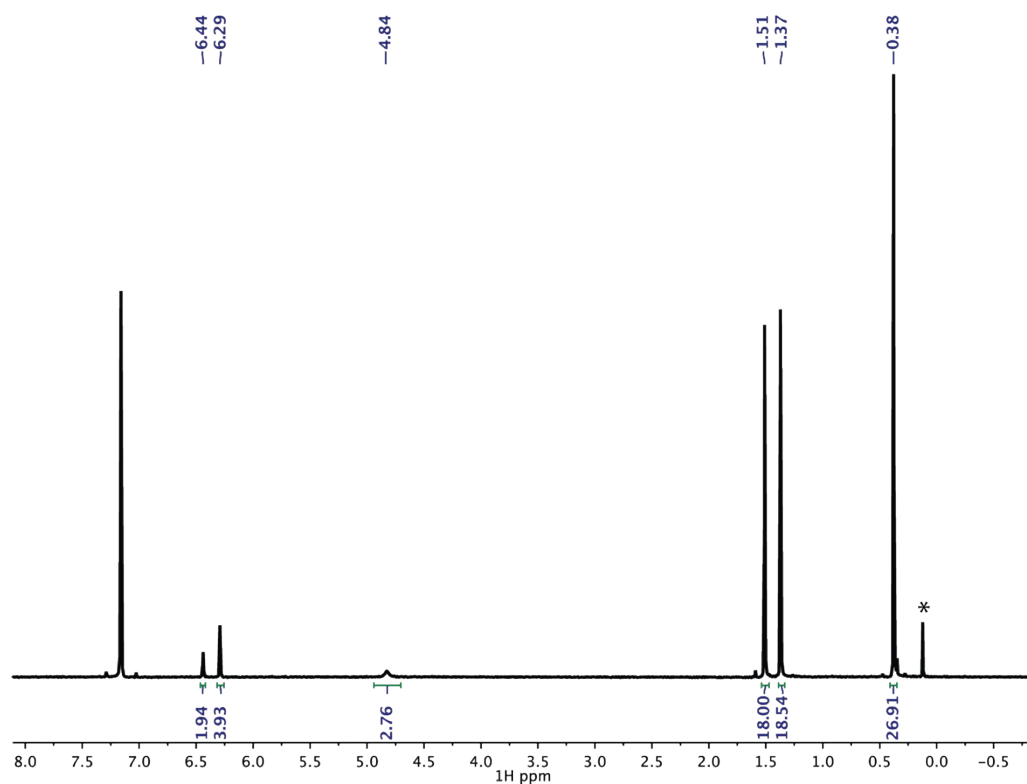

**Figure S1.** <sup>1</sup>H NMR Spectrum of **2** in C<sub>6</sub>D<sub>6</sub> at 293 K (\*= residual HMDSO)

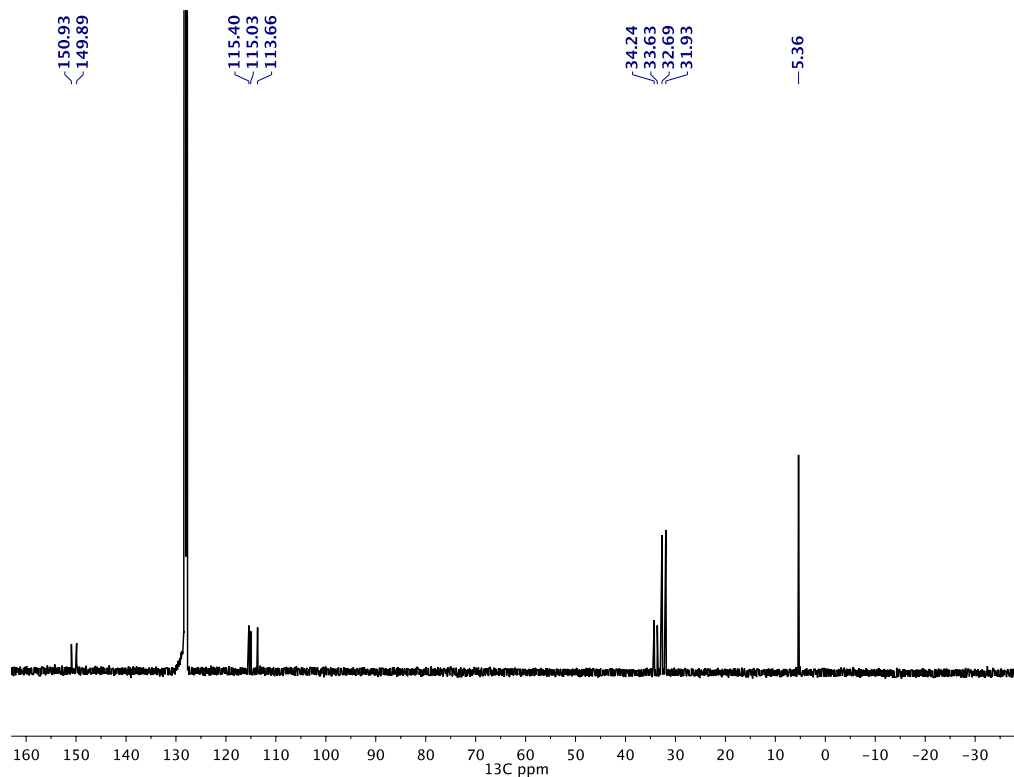

**Figure S2.** <sup>13</sup>C NMR Spectrum of **2** in C<sub>6</sub>D<sub>6</sub> at 293 K.

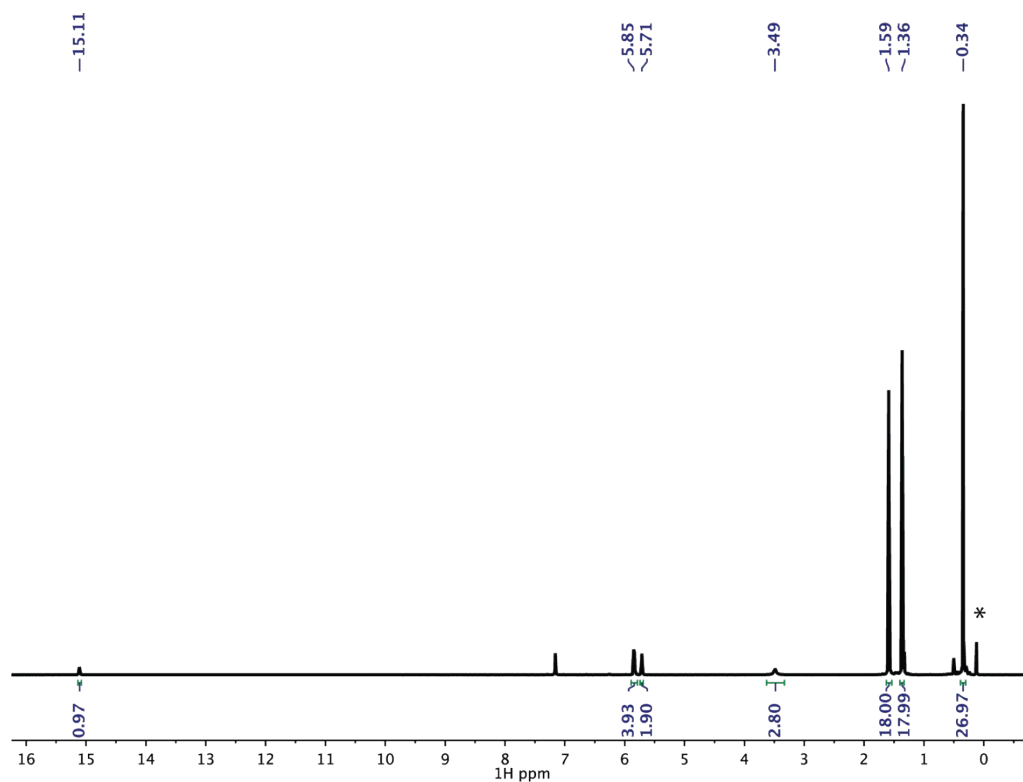

**Figure S3.** <sup>1</sup>H NMR Spectrum of **3** in C<sub>6</sub>D<sub>6</sub> at 293 K (\*= residual HMDSO).

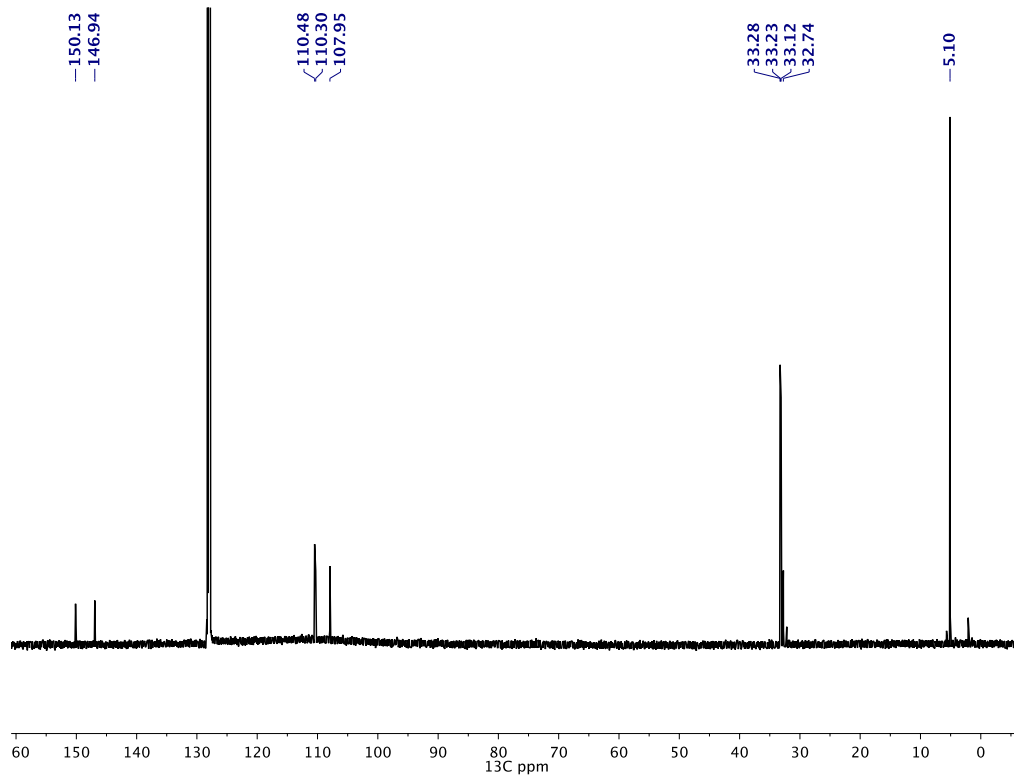

**Figure S4.** <sup>13</sup>C NMR Spectrum of **3** in C<sub>6</sub>D<sub>6</sub> at 293 K.

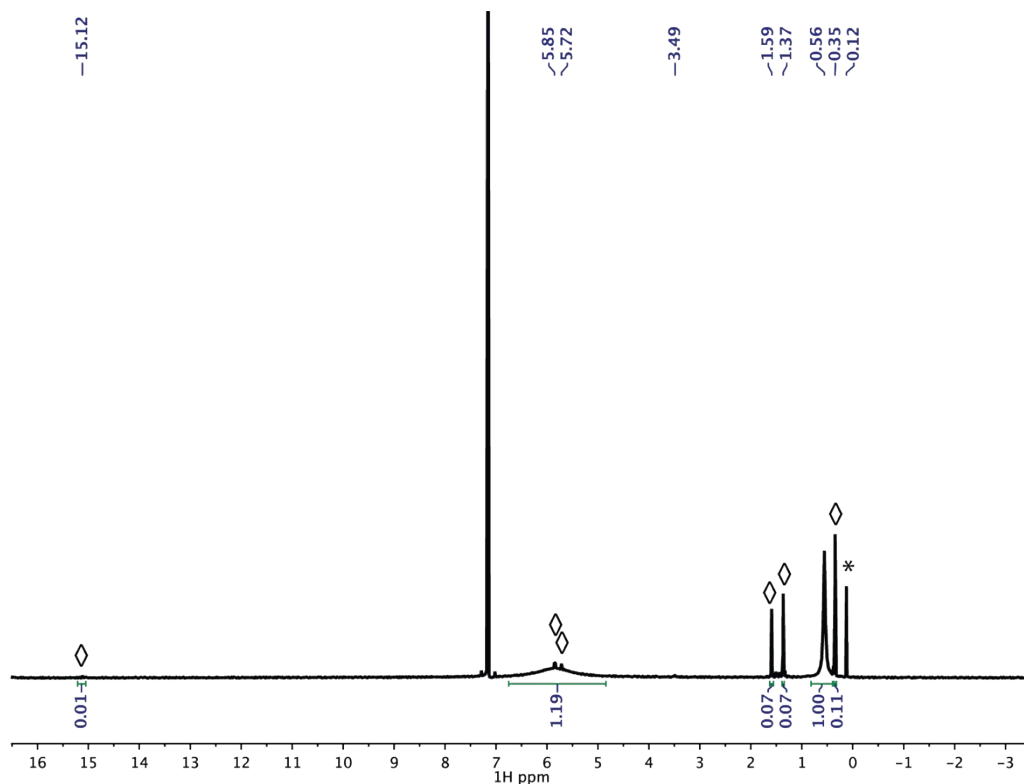

**Figure S5.** <sup>1</sup>H NMR Spectrum of **4** in C<sub>6</sub>D<sub>6</sub> at 293 K (◇=**3**, ~11%, \*= residual HMDSO).

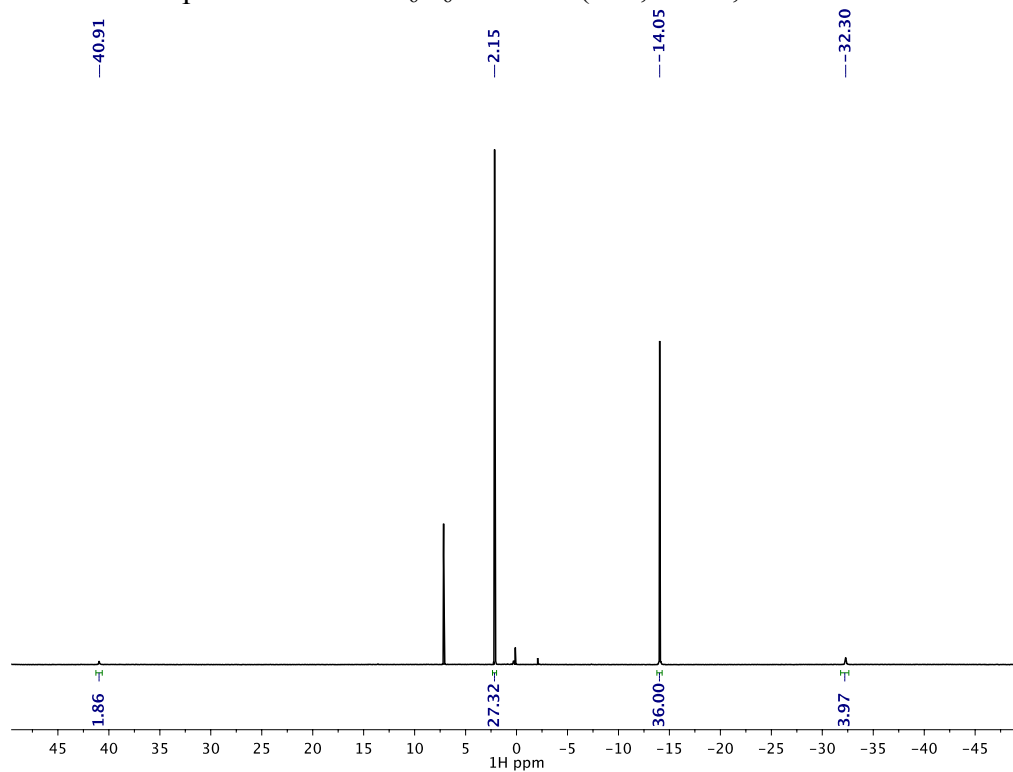

**Figure S6.** <sup>1</sup>H NMR Spectrum of **5** in C<sub>6</sub>D<sub>6</sub> at 293 K.

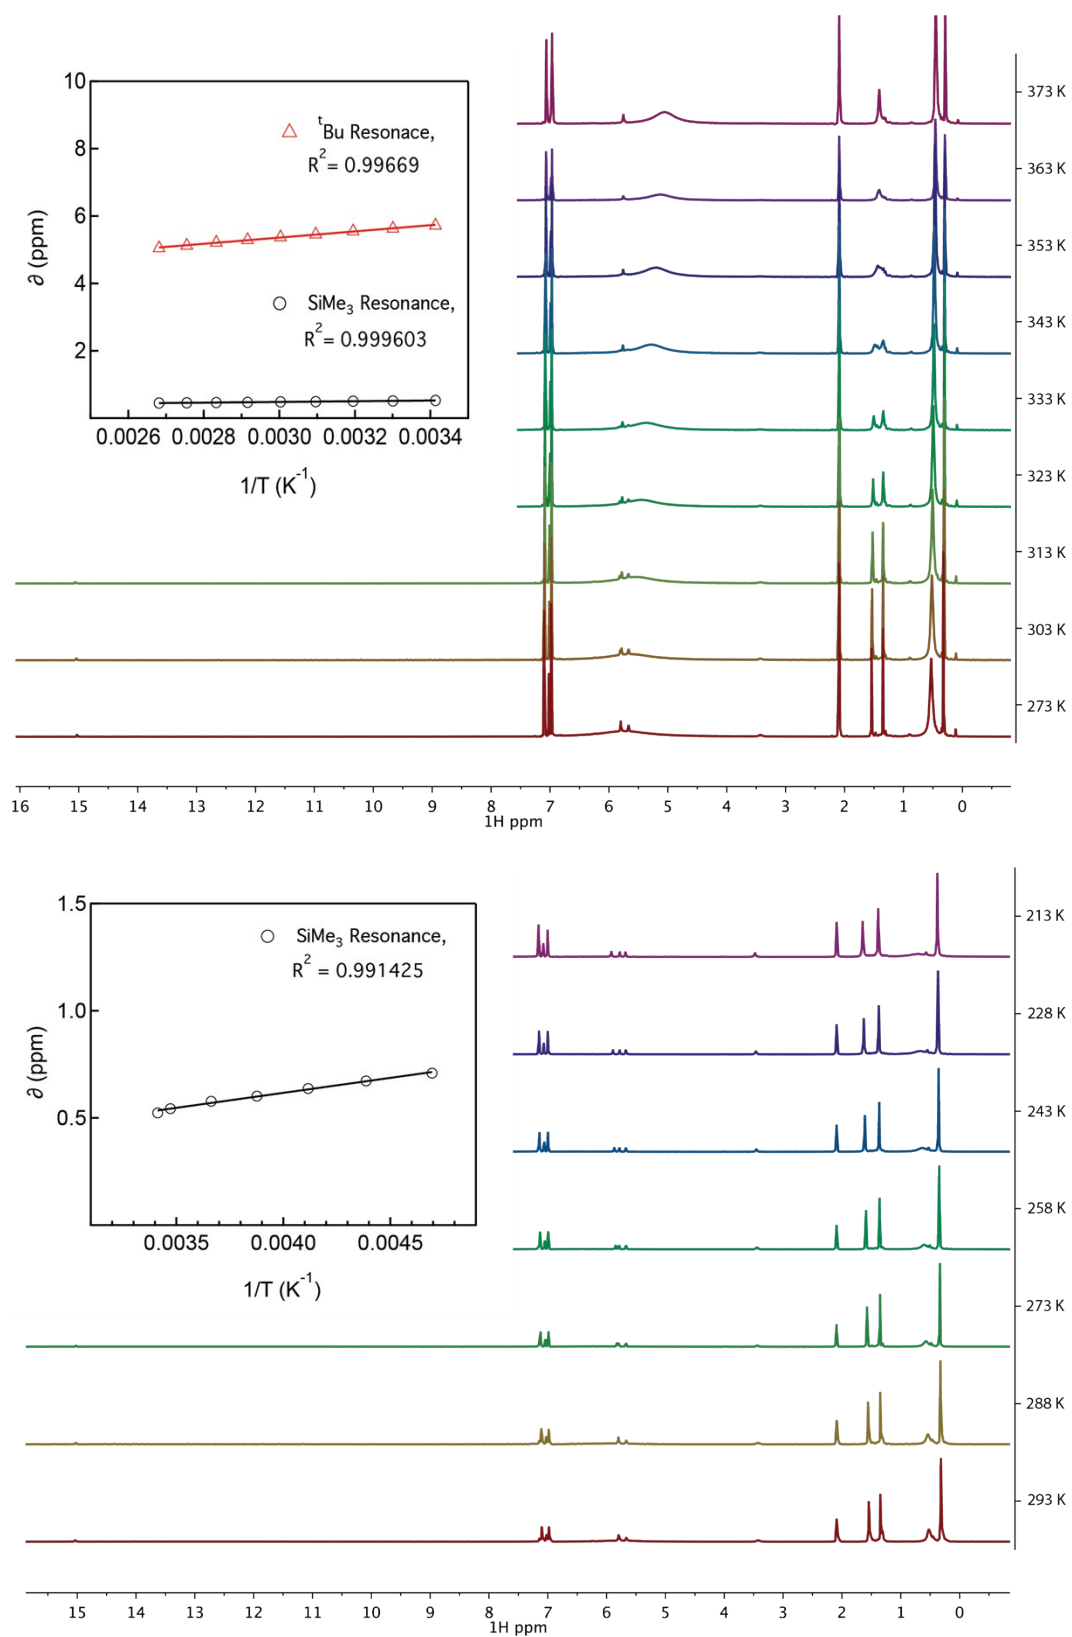

**Figure S7.** <sup>1</sup>H NMR Spectrum of **4** in d<sup>8</sup>-toluene at varying temperatures. Paramagnetic resonance shows linear dependence with 1/T, following the Curie law.



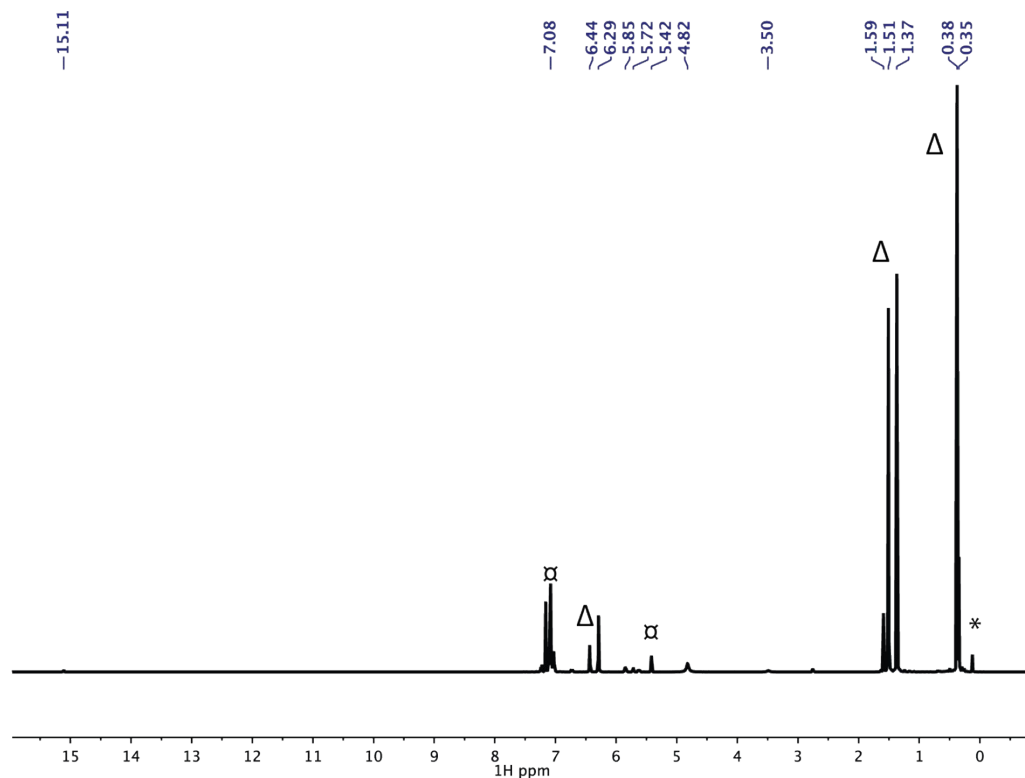

**Figure S8.**  $^1\text{H}$  NMR spectrum of products resulting from the reaction of **3** with triphenylchloromethane in  $\text{C}_6\text{D}_6$  at 293 K ( $\Delta$ = **4**,  $\square$ = triphenylmethane, \*= residual HMDSO).

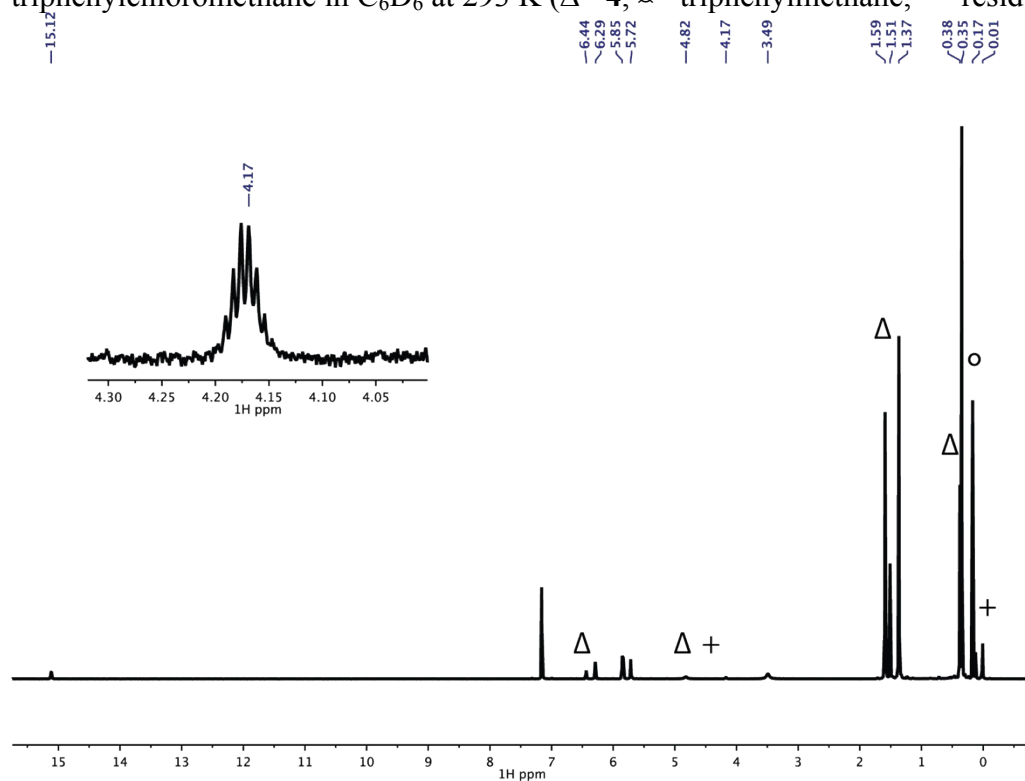

**Figure S9.** Representative  $^1\text{H}$  NMR spectrum of products resulting from the reaction of **3** with trimethylchlorosilane in  $\text{C}_6\text{D}_6$  at 293 K (reaction had not gone to completion,  $\Delta$ = **4**, += trimethylsilane,  $^{\circ}$ = trimethylchlorosilane). Inset shows dectet resonance from silane generated.<sup>9</sup>

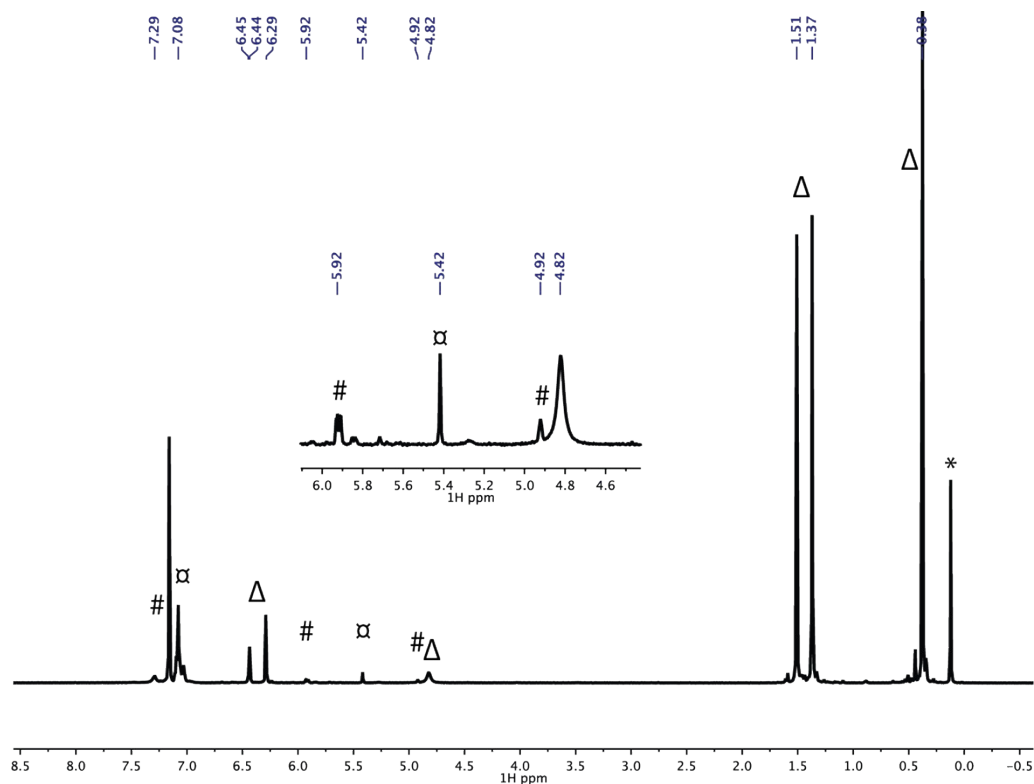

**Figure S10.**  $^1\text{H}$  NMR spectrum of products resulting from the reaction of **4** with triphenylchloromethane in  $\text{C}_6\text{D}_6$  at 293 K ( $\Delta$ = **4**, #= Gomberg's dimer,  $\square$ = triphenylmethane, \*= residual HMDSO). Inset shows diagnostic resonances corresponding to triphenylmethane and Gomberg's dimer.<sup>10</sup>

### C. Infrared Spectra

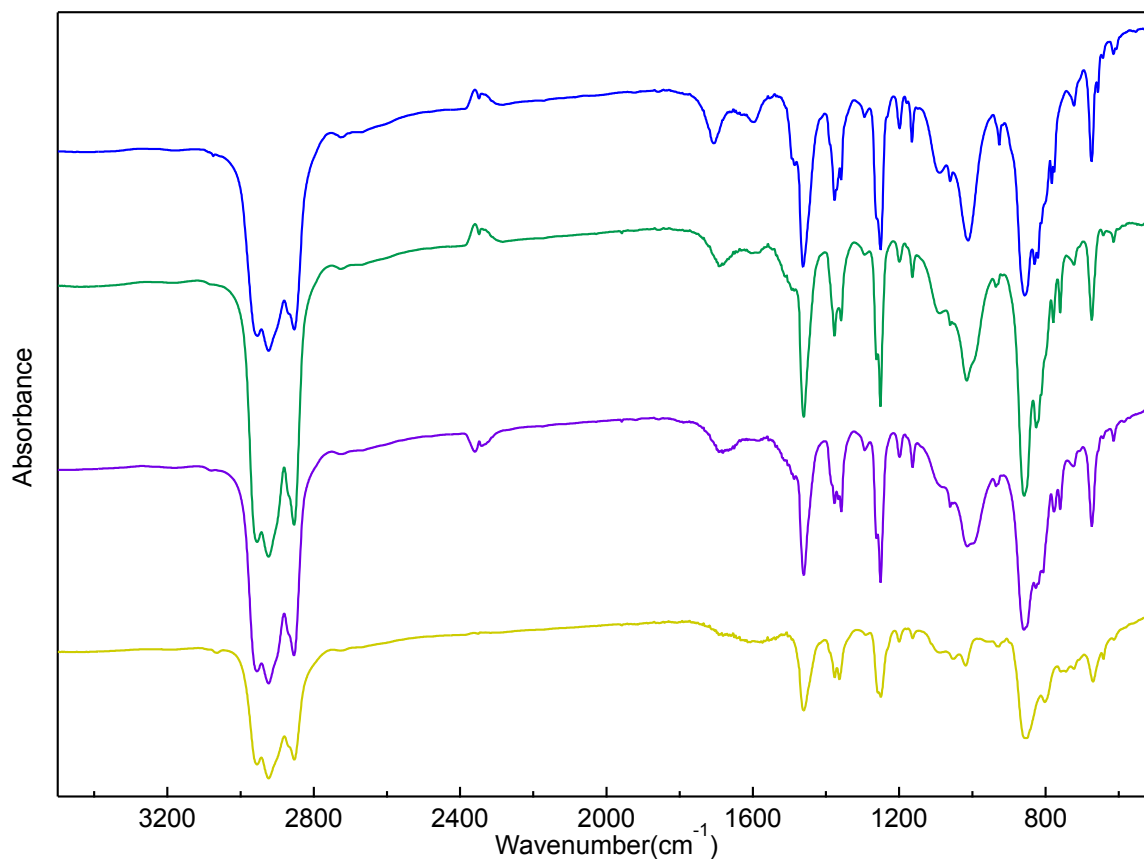

**Figure S11:** Infrared spectrum of **2** (blue), **3** (green), **4** (purple), **5** (yellow). Compound **2** (KBr, Nujol, cm<sup>-1</sup>): 1708 (m), 1597 (m), 1463 (s), 1377 (m), 1251 (s), 1199 (w), 1166 (w), 1012 (m, br), 927 (w), 857 (s, br), 645 (m). Compound **3** (KBr, Nujol, cm<sup>-1</sup>): 1693 (m), 1461 (s), 1377 (m), 1252 (s), 1200 (w), 1164 (w), 1016 (m, br), 859 (s, br), 674 (m). Compound **4** (KBr, Nujol, cm<sup>-1</sup>): 1683 (m), 1462 (s), 1377 (s), 1252 (s), 1199 (w), 1164 (w), 1015 (m, br), 860 (s, br), 674 (m). Compound **5** (KBr, Nujol, cm<sup>-1</sup>): 1574 (m), 1462 (s), 1377 (m), 1251 (s), 1200 (w), 1164 (w), 1019 (m, br), 853 (s, br), 671 (m).

#### D. UV-Visible Spectra

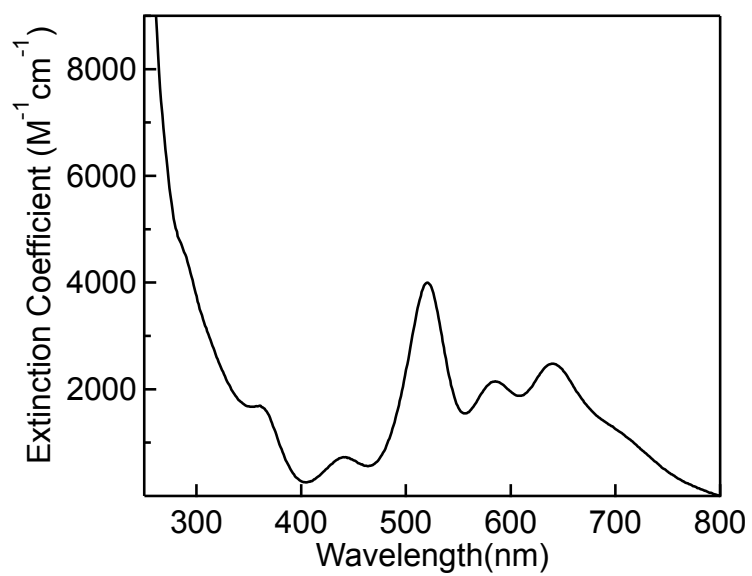

**Figure S12:** UV-Visible spectrum of **4** in hexane at 295 K.

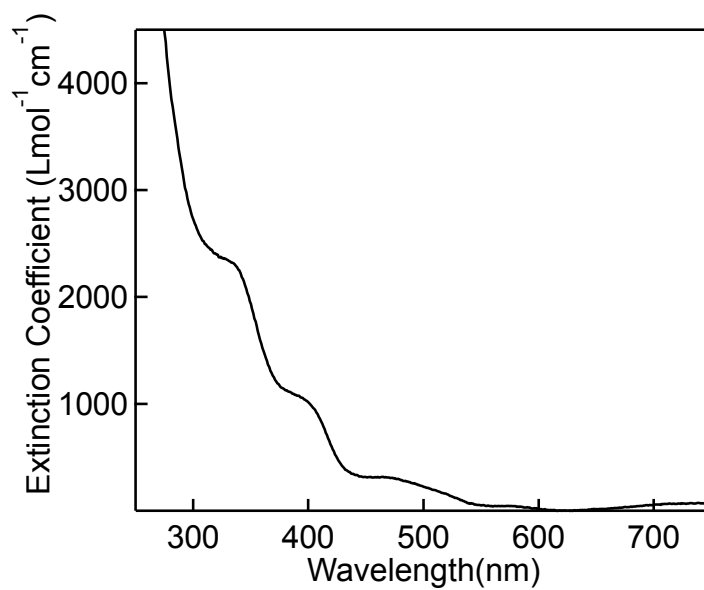

**Figure S13:** UV-Visible spectrum of **5** in hexane at 295 K.

## E. Crystallographic Details

X-ray diffraction data for  $\text{Cp}^*_2\text{ThClH}_3\text{AlC}(\text{SiMe}_3)_3$  (**2**) and  $\text{Cp}^*_2\text{UH}_3\text{AlC}(\text{SiMe}_3)_3$  (**5**) were collected at CheXray, Berkeley, CA, using a Bruker APEX II QUAZAR instrument outfitted with a microfocus Mo- $K\alpha$  radiation source ( $\lambda = 0.71073 \text{ \AA}$ ). Diffraction data for  $\text{Cp}^*_2\text{Th}(\text{H})\text{H}_3\text{AlC}(\text{SiMe}_3)_3$  (**3**) and  $\text{Cp}^*_2\text{ThH}_3\text{AlC}(\text{SiMe}_3)_3$  (**4**) were obtained at the Advanced Light Source (ALS), Lawrence Berkeley National Laboratory, Berkeley, CA, station 11.3.1, using a silicon-monochromated beam of 16 keV ( $\lambda = 0.7749 \text{ \AA}$ ) radiation. All data collections were conducted at 100 K. Absorption corrections were performed by a multiscan method, utilizing either Bruker AXS SADABS or TWINABS (for **3**) as appropriate.<sup>11</sup> Bruker APEX3 software was used for the data collection, and Bruker SAINT software for the cell refinement and data reduction procedures.<sup>12</sup> Initial structure solutions were found using direct methods (SHELXT) and were subjected to full-matrix refinements against  $F^2$  by SHELXL-2014.<sup>13</sup> All non-hydrogen atoms in all structures were refined anisotropically. Hydrogen atoms bound to or bridging between metal centers could be explicitly located in all structures and were refined isotropically with no positional restraints.

**Table S1.** Crystallographic details for compounds **2-5**.

|                                                                           | <b>2</b>                                             | <b>3</b>                                           | <b>4</b>                                           | <b>5</b>                                          |
|---------------------------------------------------------------------------|------------------------------------------------------|----------------------------------------------------|----------------------------------------------------|---------------------------------------------------|
| Chemical formula                                                          | $\text{C}_{36}\text{H}_{72}\text{AlSi}_3\text{ThCl}$ | $\text{C}_{36}\text{H}_{73}\text{AlSi}_3\text{Th}$ | $\text{C}_{36}\text{H}_{72}\text{AlSi}_3\text{Th}$ | $\text{C}_{36}\text{H}_{72}\text{AlSi}_3\text{U}$ |
| Formula weight                                                            | 883.67                                               | 849.23                                             | 848.22                                             | 854.21                                            |
| Color, habit                                                              | Colorless, block                                     | Colorless, plate                                   | Purple, tablet                                     | Brown, blocks                                     |
| Temperature (K)                                                           | 100(2)                                               | 100(2)                                             | 100(2)                                             | 100(2)                                            |
| Crystal system                                                            | Monoclinic                                           | Monoclinic                                         | Monoclinic                                         | Triclinic                                         |
| Space group                                                               | $P 2_1/n$                                            | $P 2_1/c$                                          | $P 2_1/m$                                          | $P -1$                                            |
| a (Å)                                                                     | 14.6013(10)                                          | 18.541(16)                                         | 12.933(8)                                          | 10.4534(5)                                        |
| b (Å)                                                                     | 16.3421(10)                                          | 12.528(10)                                         | 12.816(8)                                          | 12.8540(6)                                        |
| c (Å)                                                                     | 18.0401(11)                                          | 105.644(9)                                         | 13.179(8)                                          | 17.8476(8)                                        |
| $\alpha$ (°)                                                              | 90                                                   | 90                                                 | 90                                                 | 72.090(2)                                         |
| $\beta$ (°)                                                               | 93.323(3)                                            | 105.644(9)                                         | 94.460(4)                                          | 79.893(2)                                         |
| $\gamma$ (°)                                                              | 90                                                   | 90                                                 | 90                                                 | 66.898(2)                                         |
| V (Å <sup>3</sup> )                                                       | 4297.4(5)                                            | 4243(6)                                            | 2178(2)                                            | 2094.82(17)                                       |
| Z                                                                         | 4                                                    | 4                                                  | 2                                                  | 2                                                 |
| Density (Mg m <sup>-3</sup> )                                             | 1.366                                                | 1.329                                              | 1.294                                              | 1.354                                             |
| F(000)                                                                    | 1800                                                 | 1736                                               | 866                                                | 870                                               |
| Radiation Type                                                            | MoK $\alpha$                                         | Synchrotron                                        | Synchrotron                                        | MoK $\alpha$                                      |
| $\mu$ (mm <sup>-1</sup> )                                                 | 3.658                                                | 1.962                                              | 1.912                                              | 4.002                                             |
| Crystal size                                                              | 0.20 x 0.20 x 0.10                                   | 0.04 x 0.03 x 0.01                                 | 0.09 x 0.06 x 0.02                                 | 0.2 x 0.2 x 0.2                                   |
| Meas. Refl.                                                               | 133659                                               | 35013                                              | 22006                                              | 58071                                             |
| Indep. Refl.                                                              | 7921                                                 | 7699                                               | 5198                                               | 7694                                              |
| R(int)                                                                    | 0.0542                                               | 0.1080                                             | 0.0346                                             | 0.0239                                            |
| Final R indices                                                           | R = 0.0254                                           | R = 0.0477                                         | R = 0.0240                                         | R = 0.0188                                        |
| [I > 2 $\sigma$ (I)]                                                      | R <sub>w</sub> = 0.0561                              | R <sub>w</sub> = 0.0840                            | R <sub>w</sub> = 0.571                             | R <sub>w</sub> = 0.0437                           |
| Goodness-of-fit                                                           | 1.142                                                | 1.034                                              | 1.059                                              | 1.040                                             |
| $\Delta\rho_{\text{max}}, \Delta\rho_{\text{min}}$ , (e Å <sup>-3</sup> ) | 2.709, -0.948                                        | 2.533, -1.962                                      | 1.431, -1.273                                      | 1.163, -0.911                                     |
| CCDC                                                                      | 1822996                                              | 1822997                                            | 1822998                                            | 1822999                                           |

## F. Electron Paramagnetic Resonance Spectra

EPR spectroscopy was performed in the CalEPR center in Department of Chemistry, University of California at Davis. CW-EPR experiments were performed on the Bruker Biospin EleXsys E500 spectrometer with a super high Q resonator (ER4122SHQE) in perpendicular mode. Cryogenic temperature was achieved by using an ESR900 liquid helium cryostat with a temperature controller (Oxford Instrument ITC503) and gas flow controller. All continuous-wave (CW) EPR spectra were recorded under slow-passage, non-saturating conditions. Spectrometer settings were as following: conversion time = 30 ms, modulation frequency = 100 kHz, and parameters in the corresponding figure legends. Pulsed Q-band electron spin-echo detected field swept EPR (ESE-FS) was recorded on the Bruker Biospin EleXsys 580 spectrometer equipped with a R.A. Isaacson cylindrical TE<sub>011</sub> resonator. Standard Hahn-echo pulse sequence ( $\pi/2$ - $\tau$ - $\pi$ - $\tau$ -echo) was used for ESE-FS experiments. Simulations of EPR spectra were performed in Matlab 2014a with the EasySpin 5.1.10 toolbox.<sup>14</sup>

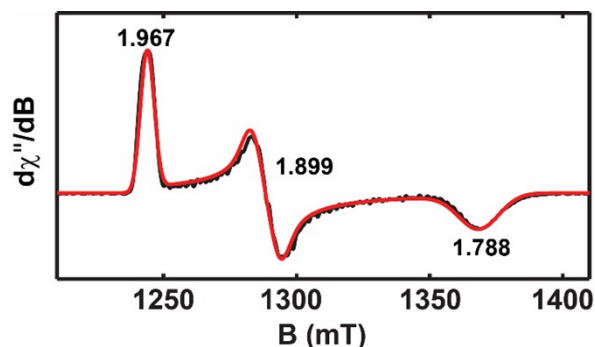

**Figure S14.** Q-band (34 GHz) pseudo-modulated free induction decay detected field-swept EPR spectrum of **4** (black trace) and simulation (red trace). Conditions: temperature, 15 K; time interval between the first ( $\pi/2$ ) and the second ( $\pi$ ) microwave pulse ( $\tau$ ) = 300 ns; modulation amplitude, 0.5 mT.

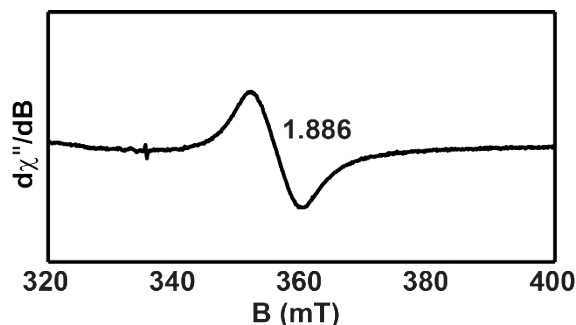

**Figure S15.** X-band (9 GHz) CW-EPR of **4** in recorded in toluene solution (230 K). Conditions: microwave power, 0.5 mW; modulation amplitude, 0.5 mT.

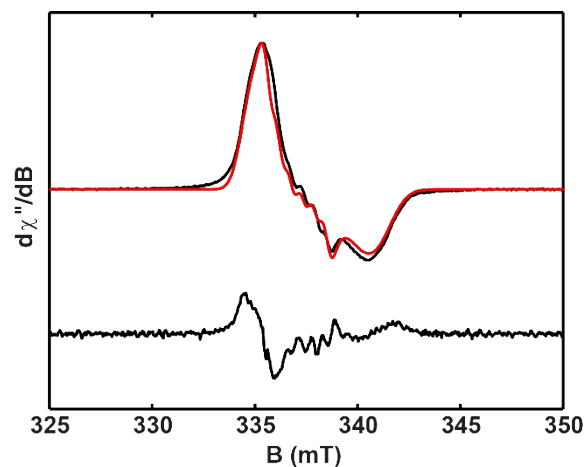

**Figure S16.** The numeric 2<sup>nd</sup> derivative (bottom trace) of the CW-EPR of **6** (top trace) showing the hyperfine splitting from <sup>27</sup>Al at different field positions. Conditions: temperature, 50 K; microwave power, 0.02 mW; modulation amplitude, 0.2 mT.

Note: the hyperfine splittings observed in **6** are not caused by the HFI from the bridging hydrides, since similar patterns can be observed with a deuteride isotopologue. HFI from <sup>1</sup>H will be analyzed further in a pulse EPR study.

## G. Computational Details

All the structures reported in this study were fully optimized with the Becke's 3-parameter hybrid functional<sup>15</sup> combined with the non-local correlation functional provided by Perdew/Wang (denoted as B3PW91).<sup>16</sup> The basis sets used for titanium, thorium, uranium as well as silicon and aluminum atoms were the Stuttgart-Dresden small core ECP in combination with its adapted basis set.<sup>17,18</sup> For the rest of the atoms the 6-31G(d,p) basis set was used.<sup>19-21</sup> In all computations no constraints were imposed on the geometry. All stationary points have been identified for minima (number of imaginary frequencies  $N_{\text{imag}}=0$ ). The vibrational modes and the corresponding frequencies are based on a harmonic force field. The GAUSSIAN09 program suite was used in all calculations.<sup>22</sup> Natural Bonding Orbital (NBO)<sup>23,24</sup> analyses were carried out using the associated module in the Gaussian package. Atoms in Molecule (AIM)<sup>25,26</sup> analysis was also performed using the Multiwfn code.<sup>27</sup>

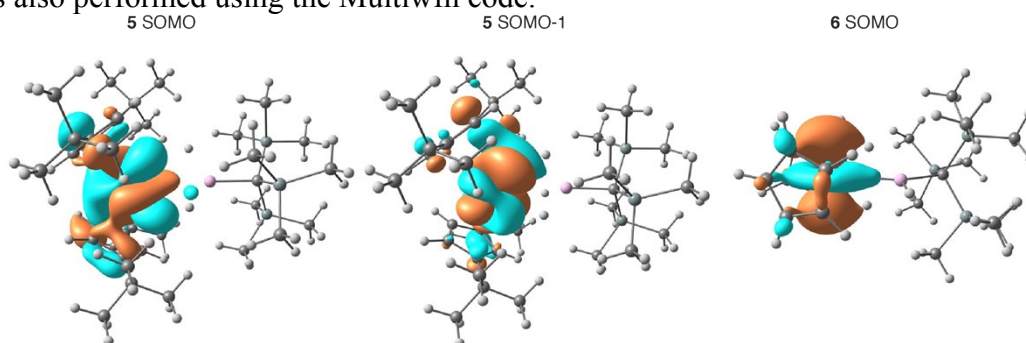

**Figure S17:** Valence orbitals for **5** and **6**. Aluminum atoms shown in pink.

Cartesian coordinates of all optimized structures

Ti-Al complex

|    |             |             |              |
|----|-------------|-------------|--------------|
| 22 | 4.884935000 | 2.969762000 | 8.301599000  |
| 14 | 0.044968000 | 4.253662000 | 5.799760000  |
| 14 | 2.404326000 | 3.414548000 | 3.880168000  |
| 14 | 2.151476000 | 6.439026000 | 4.848510000  |
| 13 | 2.934930000 | 4.459858000 | 6.986733000  |
| 6  | 6.539282000 | 2.218634000 | 6.821603000  |
| 1  | 7.207456000 | 2.929315000 | 6.353304000  |
| 6  | 5.276722000 | 1.800621000 | 6.321266000  |
| 1  | 4.825134000 | 2.127190000 | 5.397631000  |
| 6  | 1.874111000 | 4.578558000 | 5.297090000  |
| 6  | 4.910766000 | 4.949478000 | 9.612149000  |
| 1  | 4.803210000 | 5.918337000 | 9.145119000  |
| 6  | 4.724686000 | 0.864354000 | 7.233589000  |
| 1  | 3.767280000 | 0.370170000 | 7.139256000  |
| 6  | 5.628982000 | 0.719093000 | 8.305225000  |
| 1  | 5.487523000 | 0.092421000 | 9.176294000  |
| 6  | 5.802705000 | 3.017907000 | 10.454165000 |
| 1  | 6.509994000 | 2.260819000 | 10.764096000 |
| 6  | 6.122773000 | 4.252309000 | 9.829640000  |



|   |              |             |              |
|---|--------------|-------------|--------------|
| 1 | 7.114094000  | 4.601660000 | 9.571092000  |
| 6 | 4.141005000  | 3.852474000 | 3.218954000  |
| 1 | 4.888610000  | 3.939023000 | 4.014077000  |
| 1 | 4.475161000  | 3.072170000 | 2.525529000  |
| 1 | 4.138701000  | 4.798088000 | 2.668099000  |
| 6 | 6.755696000  | 1.547567000 | 8.043292000  |
| 1 | 7.625813000  | 1.656120000 | 8.676886000  |
| 6 | 3.846726000  | 4.141947000 | 10.083495000 |
| 1 | 2.798431000  | 4.400993000 | 10.044068000 |
| 6 | 4.394781000  | 2.939797000 | 10.596340000 |
| 1 | 3.838461000  | 2.118603000 | 11.029158000 |
| 6 | 3.980284000  | 6.928304000 | 5.097116000  |
| 1 | 4.293655000  | 6.839318000 | 6.143738000  |
| 1 | 4.665640000  | 6.334197000 | 4.487344000  |
| 1 | 4.106935000  | 7.980322000 | 4.815277000  |
| 6 | -0.356074000 | 4.840234000 | 7.569036000  |
| 1 | -0.131552000 | 5.895013000 | 7.738684000  |
| 1 | -1.426683000 | 4.683430000 | 7.747823000  |
| 1 | 0.186580000  | 4.259509000 | 8.323830000  |
| 6 | -0.416285000 | 2.405432000 | 5.825396000  |
| 1 | 0.271238000  | 1.814500000 | 6.437896000  |
| 1 | -1.415220000 | 2.315792000 | 6.268056000  |
| 1 | -0.458278000 | 1.955110000 | 4.830111000  |
| 6 | -1.216912000 | 5.077460000 | 4.633482000  |
| 1 | -1.161403000 | 6.169166000 | 4.649047000  |
| 1 | -1.086766000 | 4.749998000 | 3.597985000  |
| 1 | -2.228504000 | 4.794434000 | 4.947045000  |
| 6 | 1.251459000  | 3.431411000 | 2.362450000  |
| 1 | 1.662150000  | 2.752873000 | 1.605175000  |
| 1 | 0.249507000  | 3.068505000 | 2.612223000  |
| 1 | 1.151765000  | 4.418900000 | 1.906388000  |
| 6 | 1.179125000  | 7.658369000 | 5.940747000  |
| 1 | 1.448006000  | 7.545204000 | 6.994270000  |
| 1 | 1.446365000  | 8.676240000 | 5.633012000  |
| 1 | 0.093912000  | 7.563905000 | 5.849869000  |
| 6 | 1.714301000  | 6.888239000 | 3.050301000  |
| 1 | 2.354786000  | 6.388268000 | 2.318410000  |
| 1 | 0.673437000  | 6.651519000 | 2.812220000  |
| 1 | 1.848723000  | 7.968592000 | 2.921616000  |
| 6 | 2.449485000  | 1.575383000 | 4.408288000  |
| 1 | 2.559834000  | 1.444911000 | 5.487031000  |
| 1 | 1.526267000  | 1.069851000 | 4.112194000  |
| 1 | 3.277060000  | 1.055207000 | 3.913469000  |
| 1 | 4.653193000  | 4.331834000 | 7.015762000  |
| 1 | 3.030805000  | 2.963438000 | 7.844500000  |
| 1 | 2.568582000  | 5.660275000 | 7.968718000  |

Th-Al complex

|   |              |              |              |
|---|--------------|--------------|--------------|
| 6 | 6.523079000  | 10.010201000 | 7.769744000  |
| 1 | 6.209367000  | 9.196430000  | 7.126297000  |
| 6 | 8.745158000  | 13.756874000 | 9.823141000  |
| 1 | 7.944515000  | 13.781877000 | 10.569341000 |
| 1 | 9.165290000  | 14.767026000 | 9.758089000  |
| 1 | 9.524611000  | 13.081295000 | 10.189746000 |
| 6 | 9.537756000  | 7.195677000  | 8.051768000  |
| 6 | 9.263112000  | 9.765254000  | 14.263226000 |
| 6 | 6.009454000  | 10.292913000 | 9.064715000  |
| 6 | 7.465049000  | 11.009889000 | 7.423477000  |
| 1 | 7.989463000  | 11.069187000 | 6.477731000  |
| 6 | 8.227865000  | 13.310551000 | 8.448282000  |
| 6 | 11.232971000 | 8.795246000  | 8.207458000  |
| 6 | 4.621732000  | 10.035112000 | 11.165283000 |
| 1 | 5.486438000  | 9.709190000  | 11.749977000 |
| 1 | 3.727237000  | 9.561254000  | 11.584195000 |
| 1 | 4.509538000  | 11.116673000 | 11.292431000 |
| 6 | 10.694203000 | 7.610161000  | 8.779791000  |
| 1 | 11.132140000 | 7.067296000  | 9.607782000  |
| 6 | 7.582835000  | 11.929423000 | 8.502480000  |
| 6 | 12.601649000 | 9.401353000  | 8.496820000  |
| 6 | 4.775937000  | 9.649327000  | 9.689496000  |
| 6 | 9.342967000  | 8.172562000  | 7.039133000  |
| 1 | 8.556321000  | 8.171199000  | 6.294278000  |
| 6 | 7.493210000  | 5.831497000  | 7.469904000  |
| 1 | 6.816334000  | 6.557772000  | 7.930904000  |
| 1 | 7.030271000  | 4.841793000  | 7.550379000  |
| 1 | 7.580276000  | 6.067051000  | 6.404153000  |
| 6 | 6.691045000  | 11.456632000 | 9.516850000  |
| 1 | 6.512491000  | 11.949975000 | 10.463365000 |
| 6 | 8.678980000  | 5.409679000  | 9.628695000  |
| 1 | 9.632373000  | 5.380781000  | 10.165485000 |
| 1 | 8.239705000  | 4.407000000  | 9.682225000  |
| 1 | 8.011891000  | 6.098202000  | 10.160101000 |
| 6 | 13.136069000 | 8.944590000  | 9.860377000  |
| 1 | 12.455413000 | 9.221564000  | 10.670728000 |
| 1 | 14.107877000 | 9.409475000  | 10.058598000 |
| 1 | 13.278769000 | 7.859588000  | 9.892982000  |
| 6 | 7.140172000  | 14.303418000 | 7.981860000  |
| 1 | 6.753431000  | 14.025956000 | 6.995791000  |
| 1 | 7.548050000  | 15.319179000 | 7.915985000  |
| 1 | 6.297113000  | 14.319498000 | 8.680097000  |
| 6 | 10.364776000 | 9.151696000  | 7.141064000  |
| 1 | 10.487785000 | 9.999294000  | 6.476787000  |

|    |              |              |              |
|----|--------------|--------------|--------------|
| 6  | 12.567314000 | 10.935995000 | 8.457912000  |
| 1  | 12.228505000 | 11.306321000 | 7.484937000  |
| 1  | 13.569235000 | 11.343795000 | 8.634362000  |
| 1  | 11.895536000 | 11.338430000 | 9.224427000  |
| 6  | 4.808563000  | 8.118238000  | 9.577343000  |
| 1  | 4.883726000  | 7.791294000  | 8.535269000  |
| 1  | 3.888735000  | 7.687800000  | 9.989844000  |
| 1  | 5.658886000  | 7.701971000  | 10.128308000 |
| 6  | 9.388382000  | 13.351490000 | 7.444949000  |
| 1  | 10.188663000 | 12.663788000 | 7.736392000  |
| 1  | 9.812314000  | 14.360804000 | 7.401370000  |
| 1  | 9.060638000  | 13.092009000 | 6.432811000  |
| 6  | 3.548161000  | 10.176181000 | 8.914060000  |
| 1  | 3.491219000  | 11.268306000 | 8.966087000  |
| 1  | 2.623193000  | 9.764956000  | 9.335547000  |
| 1  | 3.596065000  | 9.892836000  | 7.857677000  |
| 6  | 8.861359000  | 5.833710000  | 8.163184000  |
| 6  | 13.566921000 | 8.899931000  | 7.400577000  |
| 1  | 13.609193000 | 7.805983000  | 7.388636000  |
| 1  | 14.580207000 | 9.279448000  | 7.578238000  |
| 1  | 13.246409000 | 9.234101000  | 6.408703000  |
| 6  | 9.772429000  | 4.804234000  | 7.459821000  |
| 1  | 9.923698000  | 5.069958000  | 6.408507000  |
| 1  | 9.326047000  | 3.803409000  | 7.499179000  |
| 1  | 10.755669000 | 4.757264000  | 7.938654000  |
| 13 | 9.043820000  | 9.675994000  | 12.314445000 |
| 14 | 11.159756000 | 9.793393000  | 14.582716000 |
| 14 | 8.405096000  | 11.375656000 | 14.866750000 |
| 14 | 8.425030000  | 8.180467000  | 14.958522000 |
| 90 | 8.739298000  | 9.545187000  | 9.383465000  |
| 6  | 6.763282000  | 11.678951000 | 13.953459000 |
| 1  | 6.331860000  | 12.626304000 | 14.297598000 |
| 1  | 6.021303000  | 10.894797000 | 14.118072000 |
| 1  | 6.925546000  | 11.771270000 | 12.873745000 |
| 6  | 12.060834000 | 10.967996000 | 13.383672000 |
| 1  | 13.142035000 | 10.827979000 | 13.498134000 |
| 1  | 11.839020000 | 12.019881000 | 13.575854000 |
| 1  | 11.818047000 | 10.762744000 | 12.335411000 |
| 6  | 8.770055000  | 6.663422000  | 13.859670000 |
| 1  | 8.264268000  | 5.792197000  | 14.292269000 |
| 1  | 9.832070000  | 6.423637000  | 13.772902000 |
| 1  | 8.369323000  | 6.799449000  | 12.848870000 |
| 6  | 11.613310000 | 10.343933000 | 16.346435000 |
| 1  | 12.701284000 | 10.293012000 | 16.469149000 |
| 1  | 11.161207000 | 9.698443000  | 17.104368000 |
| 1  | 11.307419000 | 11.373707000 | 16.552557000 |

|   |              |              |              |
|---|--------------|--------------|--------------|
| 6 | 6.525706000  | 8.301631000  | 14.998907000 |
| 1 | 6.113450000  | 8.478293000  | 14.000549000 |
| 1 | 6.146036000  | 9.077672000  | 15.669004000 |
| 1 | 6.129041000  | 7.342020000  | 15.350700000 |
| 6 | 9.424509000  | 12.942851000 | 14.509428000 |
| 1 | 9.662300000  | 13.035912000 | 13.445122000 |
| 1 | 10.358418000 | 12.997537000 | 15.075453000 |
| 1 | 8.820642000  | 13.813937000 | 14.789547000 |
| 6 | 8.980225000  | 7.749521000  | 16.726837000 |
| 1 | 10.046357000 | 7.512910000  | 16.787698000 |
| 1 | 8.427400000  | 6.867334000  | 17.069639000 |
| 1 | 8.773955000  | 8.564099000  | 17.427010000 |
| 6 | 11.976744000 | 8.096512000  | 14.310435000 |
| 1 | 13.058620000 | 8.209003000  | 14.446629000 |
| 1 | 11.808715000 | 7.727727000  | 13.293826000 |
| 1 | 11.635175000 | 7.332025000  | 15.013642000 |
| 6 | 8.040618000  | 11.380830000 | 16.733997000 |
| 1 | 8.952196000  | 11.256183000 | 17.325372000 |
| 1 | 7.336715000  | 10.597761000 | 17.029298000 |
| 1 | 7.594898000  | 12.344104000 | 17.007564000 |
| 1 | 7.715214000  | 9.041880000  | 11.502060000 |
| 1 | 10.054350000 | 8.806632000  | 11.321143000 |
| 1 | 9.130427000  | 10.972313000 | 11.267107000 |

#### U-Al complex

|   |             |              |             |
|---|-------------|--------------|-------------|
| 6 | 5.058473000 | 9.567181000  | 3.550640000 |
| 6 | 3.376115000 | 7.958109000  | 1.401196000 |
| 1 | 2.403775000 | 7.923281000  | 0.895780000 |
| 1 | 3.504259000 | 7.003054000  | 1.922818000 |
| 1 | 4.150404000 | 8.030212000  | 0.634246000 |
| 6 | 1.919449000 | 9.057400000  | 3.785846000 |
| 1 | 1.717609000 | 9.860450000  | 4.500105000 |
| 1 | 2.077091000 | 8.130859000  | 4.346370000 |
| 1 | 1.018043000 | 8.925399000  | 3.176052000 |
| 6 | 2.920354000 | 10.987264000 | 1.646612000 |
| 1 | 3.621322000 | 11.203266000 | 0.835104000 |
| 1 | 2.871810000 | 11.867207000 | 2.294402000 |
| 1 | 1.929966000 | 10.849708000 | 1.197456000 |
| 6 | 6.386091000 | 9.672744000  | 0.655593000 |
| 1 | 7.239776000 | 10.092153000 | 0.110694000 |
| 1 | 5.479858000 | 9.953875000  | 0.112658000 |
| 1 | 6.479245000 | 8.582747000  | 0.627278000 |
| 6 | 6.363496000 | 12.221623000 | 2.336550000 |
| 1 | 6.538484000 | 12.704776000 | 3.302190000 |
| 1 | 5.401888000 | 12.573449000 | 1.952558000 |
| 1 | 7.143775000 | 12.569078000 | 1.649528000 |

|    |              |              |             |
|----|--------------|--------------|-------------|
| 6  | 8.174354000  | 9.855261000  | 3.062768000 |
| 1  | 8.320355000  | 8.769801000  | 3.057748000 |
| 1  | 8.391128000  | 10.220338000 | 4.068964000 |
| 1  | 8.920226000  | 10.283207000 | 2.382696000 |
| 6  | 4.088295000  | 9.382719000  | 6.554395000 |
| 1  | 3.068396000  | 9.081081000  | 6.306855000 |
| 1  | 4.056698000  | 9.928356000  | 7.504632000 |
| 1  | 4.680218000  | 8.475421000  | 6.719108000 |
| 6  | 6.567635000  | 10.971094000 | 5.984164000 |
| 1  | 7.206338000  | 10.095822000 | 6.138837000 |
| 1  | 6.382683000  | 11.420269000 | 6.966988000 |
| 1  | 7.124714000  | 11.700843000 | 5.390552000 |
| 6  | 3.867324000  | 12.089190000 | 5.114077000 |
| 1  | 4.280088000  | 12.783651000 | 4.376699000 |
| 1  | 3.881770000  | 12.590831000 | 6.088568000 |
| 1  | 2.820318000  | 11.905136000 | 4.855819000 |
| 13 | 5.619379000  | 7.717581000  | 3.943533000 |
| 14 | 3.382981000  | 9.420272000  | 2.624001000 |
| 14 | 6.434130000  | 10.322034000 | 2.444126000 |
| 14 | 4.889638000  | 10.486330000 | 5.225460000 |
| 1  | 6.703227000  | 7.331743000  | 5.163466000 |
| 1  | 4.519536000  | 6.547642000  | 4.418613000 |
| 1  | 6.347376000  | 6.767266000  | 2.818598000 |
| 6  | 7.243414000  | 3.967195000  | 2.048783000 |
| 1  | 6.928279000  | 4.542192000  | 1.186910000 |
| 6  | 8.457017000  | 4.159552000  | 2.756522000 |
| 6  | 8.483657000  | 3.175996000  | 3.788930000 |
| 1  | 9.294558000  | 3.006759000  | 4.488957000 |
| 6  | 7.321763000  | 2.370279000  | 3.675567000 |
| 1  | 7.092950000  | 1.513954000  | 4.297790000 |
| 6  | 6.536661000  | 2.855227000  | 2.596526000 |
| 6  | 9.601703000  | 5.092973000  | 2.379915000 |
| 6  | 5.305790000  | 2.205363000  | 1.975895000 |
| 6  | 9.203554000  | 6.019134000  | 1.223437000 |
| 1  | 10.031049000 | 6.694051000  | 0.979016000 |
| 1  | 8.332457000  | 6.629744000  | 1.480904000 |
| 1  | 8.965254000  | 5.447084000  | 0.320747000 |
| 6  | 10.801328000 | 4.233521000  | 1.931132000 |
| 1  | 10.527480000 | 3.597965000  | 1.083028000 |
| 1  | 11.148494000 | 3.581223000  | 2.738693000 |
| 1  | 11.639616000 | 4.870726000  | 1.625032000 |
| 6  | 10.031340000 | 5.949511000  | 3.582232000 |
| 1  | 10.348475000 | 5.326985000  | 4.425140000 |
| 1  | 9.213332000  | 6.600639000  | 3.917783000 |
| 1  | 10.872742000 | 6.600666000  | 3.318541000 |
| 6  | 5.716139000  | 1.575661000  | 0.628435000 |

|    |              |             |              |
|----|--------------|-------------|--------------|
| 1  | 6.089189000  | 2.335919000 | -0.064827000 |
| 1  | 4.861111000  | 1.075729000 | 0.157477000  |
| 1  | 6.509531000  | 0.835208000 | 0.771215000  |
| 6  | 4.205316000  | 3.248303000 | 1.716215000  |
| 1  | 3.835552000  | 3.683902000 | 2.653058000  |
| 1  | 3.344401000  | 2.791261000 | 1.215028000  |
| 1  | 4.563532000  | 4.064788000 | 1.081866000  |
| 6  | 4.747807000  | 1.098433000 | 2.879819000  |
| 1  | 5.481509000  | 0.300439000 | 3.032751000  |
| 1  | 3.857921000  | 0.648546000 | 2.426466000  |
| 1  | 4.461802000  | 1.486071000 | 3.863864000  |
| 6  | 5.465249000  | 5.204558000 | 7.422135000  |
| 1  | 5.140330000  | 6.184500000 | 7.745114000  |
| 6  | 6.795020000  | 4.708928000 | 7.527489000  |
| 6  | 6.774118000  | 3.381392000 | 7.016537000  |
| 1  | 7.610891000  | 2.692623000 | 6.987436000  |
| 6  | 5.448002000  | 3.073409000 | 6.613829000  |
| 1  | 5.114786000  | 2.108398000 | 6.248539000  |
| 6  | 4.618993000  | 4.201286000 | 6.882222000  |
| 6  | 7.963128000  | 5.374844000 | 8.245878000  |
| 6  | 3.096147000  | 4.228766000 | 6.812152000  |
| 6  | 8.203035000  | 4.625319000 | 9.572561000  |
| 1  | 9.023629000  | 5.087229000 | 10.134580000 |
| 1  | 8.460586000  | 3.576496000 | 9.394222000  |
| 1  | 7.305244000  | 4.646911000 | 10.198365000 |
| 6  | 9.243258000  | 5.305739000 | 7.398134000  |
| 1  | 9.138087000  | 5.891865000 | 6.476824000  |
| 1  | 9.495366000  | 4.275783000 | 7.125116000  |
| 1  | 10.096403000 | 5.721996000 | 7.946126000  |
| 6  | 7.660278000  | 6.846370000 | 8.558895000  |
| 1  | 6.800184000  | 6.944670000 | 9.228926000  |
| 1  | 7.449156000  | 7.415200000 | 7.647225000  |
| 1  | 8.519736000  | 7.309748000 | 9.055618000  |
| 6  | 2.549586000  | 3.205482000 | 7.828872000  |
| 1  | 2.894576000  | 3.441336000 | 8.840632000  |
| 1  | 2.881541000  | 2.189863000 | 7.591016000  |
| 1  | 1.453055000  | 3.212692000 | 7.830596000  |
| 6  | 2.594213000  | 3.851433000 | 5.409248000  |
| 1  | 1.499198000  | 3.807999000 | 5.385910000  |
| 1  | 2.967484000  | 2.871009000 | 5.095329000  |
| 1  | 2.903934000  | 4.601087000 | 4.670296000  |
| 6  | 2.549032000  | 5.616210000 | 7.170622000  |
| 1  | 1.455543000  | 5.618074000 | 7.103893000  |
| 1  | 2.931096000  | 6.383135000 | 6.490077000  |
| 1  | 2.818293000  | 5.900713000 | 8.192937000  |
| 92 | 6.391226000  | 4.861724000 | 4.675907000  |

## H. References

- 1 A. C. Brown, A. B. Altman, T. D. Lohrey, S. Hohloch and J. Arnold, *Chem. Sci.*, 2017, **8**, 5153–5160.
- 2 W. W. Lukens, S. M. Beshouri, L. L. Bloesch, A. L. Stuart and R. A. Andersen, *Organometallics*, 1999, **18**, 1235–1246.
- 3 M. J. Monreal, R. K. Thomson, T. Cantat, N. E. Travia, B. L. Scott and J. L. Kiplinger, *Organometallics*, 2011, **30**, 2031–2038.
- 4 T. Cantat, B. L. Scott and J. L. Kiplinger, *Chem. Commun.*, 2010, **46**, 919–921.
- 5 M. A. Araya, F. A. Cotton, J. H. Matonic and C. A. Murillo, *Inorg. Chem.*, 1995, **34**, 5424–5428.
- 6 W. Ren, G. Zi, D.-C. Fang and M. D. Walter, *Chem. Eur. J.*, 2011, **17**, 12669–12682.
- 7 A. Zalkin, A. L. Stuart and R. A. Andersen, *Acta Crystallogr C Cryst Struct Commun*, 1988, **44**, 2106–2108.
- 8 W. W. Lukens, S. M. Beshouri, A. L. Stuart and R. A. Andersen, *Organometallics*, 1999, **18**, 1247–1252.
- 9 F. Schulz, V. Sumerin, M. Leskelä, T. Repo and B. Rieger, *Dalton Trans.*, 2010, **39**, 1920–1922.
- 10 A. J. Rosenthal, M. Devillard, K. Miqueu, G. Bouhadir and D. Bourissou, *Angew. Chem. Int. Ed.*, 2015, **54**, 9198–9202.
- 11 G. M. Sheldrick, *SADABS, Version 2.03*; Bruker Analytical X-Ray Systems, Inc.: Madison, 2000.
- 12 S. SAINT, *Area-Detector Integration Program, V. 6.40*. Bruker Analytical X-ray Systems, Inc.: Madison, 2003.
- 13 G. M. Sheldrick, *Acta Crystallogr C Struct Chem*, 2015, **71**, 3–8.
- 14 S. Stoll and A. Schweiger, *Journal of Magnetic Resonance*, 2006.
- 15 A. D. Becke, *J. Chem. Phys.*, 1993, **98**, 5648.
- 16 J. P. Perdew and Y. Wang, *Phys. Rev. B*, 1992, **45**, 13244–13249.
- 17 W. Küchle, M. Dolg, H. Stoll and H. Preuss, *J. Chem. Phys.*, 1994, **100**, 7535–7542.
- 18 X. Cao, M. Dolg and H. Stoll, *J. Chem. Phys.*, 2003, **118**, 487–496.
- 19 R. Ditchfield, W. J. Hehre and J. A. Pople, *J. Chem. Phys.*, 1971, **54**, 724–728.
- 20 W. J. Hehre, R. Ditchfield and J. A. Pople, *J. Chem. Phys.*, 1972, **56**, 2257–2261.
- 21 P. C. Hariharan and J. A. Pople, *Theoret. Chim. Acta*, 1973, **28**, 213–222.
- 22 R. A. Gaussian 09, M. J. Frisch, G. W. Trucks, H. B. Schlegel, G. E. Scuseria, M. A. Robb, J. R. Cheeseman, G. Scalmani, V. Barone, B. Mennucci, G. A. Petersson, H. Nakatsuji, M. Caricato, X. Li, H. P. Hratchian, A. F. Izmaylov, J. Bloino, G. Zheng, J. L. Sonnenberg, M. Hada, M. Ehara, K. Toyota, R. Fukuda, J. Hasegawa, M. Ishida, T. Nakajima, Y. Honda, O. Kitao, H. Nakai, T. Vreven, J. A. Montgomery, Jr., J. E. Peralta, F. Ogliaro, M. Bearpark, J. J. Heyd, E. Brothers, K. N. Kudin, V. N. Staroverov, R. Kobayashi, J. Normand, K. Raghavachari, A. Rendell, J. C. Burant, S. S. Iyengar, J. Tomasi, M. Cossi, N. Rega, J. M. Millam, M. Klene, J. E. Knox, J. B. Cross, V. Bakken, C. Adamo, J. Jaramillo, R. Gomperts, R. E. Stratmann, O. Yazyev, A. J. Austin, R. Cammi, C. Pomelli, J. W. Ochterski, R. L. Martin, K. Morokuma, V. G. Zakrzewski, G. A. Voth, P. Salvador, J. J. Dannenberg, S. Dapprich, A. D. Daniels, O. Farkas, J. B. Foresman, J. V. Ortiz, J. Cioslowski, D. J. Fox, Gaussian, Inc., Wallingford CT, 2009.

- 23 J. P. Foster, F. Weinhold, *J. Am. Chem. Soc.*, 1980, **102**, 7211-7218.
- 24 F. Weinhold, J.E. Carpenter, *The Natural Bond Orbital Lewis Structure Concept for Molecules, Radicals and Radical Ions*. In: R. Naaman, Z. Vager (eds.) *The Structure of Small Molecules and Ions*. Springer: Boston, MA; 1988.
- 25 R. F. W. Bader *An Introduction to the Electronic Structure of Atoms and Molecules*. Clarke: Toronto, Canada; 1970.
- 26 T. Lu, F. Chen, *J. Comp. Chem.* 2012, **33**, 580-592.
- 27 G. A. Zhurko, ChemCraft Home Page: a set of graphical tools for facilitating working with quantum chemistry computations (<http://www.chemcraftprog.com>).
